# Supplementary material
Source: HighWire-hosted journal article supplement (https://cmajopen.ca/highwire/filestream/85470/field_highwire_adjunct_files/4/2020-0099-original-submission.pdf)
Supplement: 2020-0099-original-submission.pdf [file 2020-0099-original-submission.pdf]

1  
2  
3 **Home blood pressure monitoring in the diagnosis and treatment of hypertension in**  
4  
5 **pregnancy: A systematic review and meta-analysis**  
6  
7  
8  
9

10 Tran KC (1,2), Padwal, R (3), Khan N (1,2), Chan WS (1)  
11  
12  
13

- 14  
15 1. Department of Medicine, Division of General Internal Medicine, University of British  
16  
17 Columbia, Vancouver, British Columbia, Canada  
18  
19 2. Center for Health Evaluation and Outcome Sciences, Vancouver, British Columbia,  
20  
21 Canada  
22  
23 3. Department of Medicine, Division of General Internal Medicine, University of Alberta,  
24  
25 Edmonton, Alberta, Canada  
26  
27  
28  
29

30 Abstract: 245

31 Text: 2588

32  
33  
34 References: 37

35  
36  
37 Tables: 2

38  
39  
40 Figures: 3

41 **Corresponding Author**  
42

43 Dr. Karen Tran  
44

45 2775 Laurel Street, 7<sup>th</sup> Floor, Station 3  
46

47 Vancouver General Hospital  
48

49 Vancouver, BC, V5Z 1M9  
50

51  
52 Tel: 604 875 5181; Fax: 604 875 5906  
53

54  
55 Email: karen.tran4@vch.ca  
56  
57  
58  
59  
60

## Abstract

**Background:** Home blood pressure monitoring (HBPM) is commonly used by non-pregnant adults for the diagnosis and management of hypertension. Increasingly, HBPM is used for pregnant women; however, there are no current guidelines on the standardized use of this tool in pregnancy. The objectives of this systematic review and meta-analysis were to assess how HBPM in pregnancy is currently prescribed and to identify home blood pressure (HBP) targets that are equivalent to office blood pressure (OBP) for diagnosis and management of hypertension in pregnancy.

**Methods:** MEDLINE, Embase and CENTRAL databases were searched (inception-March 2020) for observational studies and randomized controlled trials evaluating HBPM with OBP measurements in pregnant women. We identified 17 studies that assessed HBPM with OBP (N=1603 pregnant women).

**Results:** We observed wide variation in practice patterns on how HBP was measured in pregnant women. Only one-third of studies utilized validated HBP devices. HBP was measured between 3 to 36 times per week with variable compliance between 11.2-92.0%. Equivalent HBP to OBP of 140/90 mm Hg in the third trimester ranged from 118-143/76-92 mm Hg depending on patient population and methodology. Home SBP and DBP were significantly lower than office by 4.53 (95% CI 2.64-6.41) mm Hg and 3.01 (1.42-4.60) mm Hg, respectively.

**Conclusions:** Despite the inadvertent adoption of HBPM in pregnant patients, many issues are currently unresolved; these include HBP technique, frequency of monitoring, and targets. Future

1  
2  
3 studies should prioritize using validated HBP devices, determine standardized HBP measurement  
4  
5 schedules and establish treatment targets.  
6  
7  
8  
9  
10  
11  
12  
13  
14  
15  
16  
17  
18  
19  
20  
21  
22  
23  
24  
25  
26  
27  
28  
29  
30  
31  
32  
33  
34  
35  
36  
37  
38  
39  
40  
41  
42  
43  
44  
45  
46  
47  
48  
49  
50  
51  
52  
53  
54  
55  
56  
57  
58  
59  
60

Confidential

**Introduction:**

Out-of-office blood pressure (BP) monitoring, with 24h ambulatory BP monitoring (ABPM) or home BP monitoring (HBPM) is routinely performed in adults for diagnosis and management of hypertension (1-5). Although, ABPM is the gold standard for out-of-office BP measurements, HBPM is easy to use, allows frequent measurements, cost effective, and widely available (6). Home BP (HBP) has better correlation with target end organ damage, and cardiovascular mortality compared with office BP (OBP) (6). For these reasons, hypertension guidelines in Canada and internationally have strongly endorsed HBPM.

Hypertensive disorders of pregnancy (HDP) occur in up to 10% of all pregnancies and are associated with maternal and neonatal morbidity and mortality (7). HBPM is increasingly used as a tool to monitor pregnant patients for the development of HDP (8). Canadian obstetricians, family physicians, obstetrical medicine and maternal fetal medicine specialists frequently recommend HBPM to their pregnant patients (9, 10). However, wide variation in practice on how clinicians recommend HBPM to their pregnant women was noted, highlighting a lack of relevant studies (10).

Despite the widespread use of HBPM in pregnancy, how to best measure home BP (HBP), the thresholds to initiate anti-hypertensive medications, and treatment targets are unclear. Simply extrapolating the experience of HBPM from the general population is problematic. Currently, Canadian guidelines in pregnancy recommend that a HBP mean of 135/85 mm Hg be considered equivalent to OBP mean of 140/90 mm Hg based on evidence in the non-pregnant population (11). This approach, however, has not been validated in the pregnant population. Hemodynamic

1  
2  
3 changes of pregnancy can lead to reductions in BP, with a nadir at 18-24 weeks; therefore, it is  
4 unclear if normal BP thresholds should vary according to different trimesters. Moreover, unlike  
5 the non-pregnant population, no data are available to assess maternal and neonatal outcomes with  
6 HBP compared with OBP measurements.  
7  
8  
9  
10  
11  
12  
13

14 Therefore, we sought to systematically evaluate how different investigators derive proposed  
15 diagnosed and therapeutic thresholds for HBP and to perform a meta-analysis to compare HBP  
16 and OBP measurements in pregnancy.  
17  
18  
19  
20  
21  
22  
23

## 24 **Methods:**

### 25 *Description of search concepts*

26 We conducted a search of the English language using the key words ‘hypertension’, ‘pregnancy’,  
27 ‘BP monitoring’, and ‘self-monitoring’ in MEDLINE Ovid (inception to March 2020), Embase  
28 Ovid (1974 to March 2020), and CENTRAL Ovid (inception to March 2020). Our systematic  
29 review protocol was registered with PROSPERO (CRD4202147352).  
30  
31  
32  
33  
34  
35  
36  
37  
38  
39

### 40 *Study Selection*

41 We imported all title and abstract records retrieved by electronic searches into Covidence.  
42 Duplicates were automatically removed by Covidence (14). Two reviewers (KT, WSC)  
43 independently reviewed all titles and abstracts retrieved from our electronic searches. Our  
44 inclusion criteria included pregnant women, use of home and office BP measurements,  
45 observational studies, and parallel-group randomized controlled trials. We excluded studies that  
46 did not compare home and office BP readings. Two reviewers (KT, WSC) independently  
47  
48  
49  
50  
51  
52  
53  
54  
55  
56  
57  
58  
59  
60

1  
2  
3 screened full text articles. Any disagreements were resolved by discussion. If multiple full text  
4 reports were located for the same study (i.e.: sub-study, extension), all available information  
5  
6 were used to identify the relevant outcomes. We documented the screening of studies during the  
7  
8 systematic review process using a PRISMA flow diagram (15).  
9  
10  
11  
12  
13

### 14 ***Data extraction and management***

15  
16 Study characteristics were extracted from all eligible studies. We collected information regarding  
17 brand of HBP monitor, HBP monitoring schedule, patient instructions, mean HBP stratified by  
18  
19 trimester, and upper limit of normal (ULN) of HBP readings defined as mean  $\pm$  2 standard  
20  
21 deviations (SD) or 95<sup>th</sup> percentile. For OBP measurements, we collected information regarding  
22  
23 brand of OBP measurement device, method of OBP measurements, and mean OBP for different  
24  
25 trimesters.  
26  
27  
28  
29  
30  
31  
32

33 Two reviewers (KT, WSC) extracted the data independently from eligible studies.

34  
35 Disagreements were resolved by discussion. To confirm unreported data, study protocols and  
36  
37 supplementary material were reviewed, and study authors were contacted for missing data, up to  
38  
39 three times via email.  
40  
41  
42  
43

### 44 ***Assessment of Study Quality***

45  
46 We assessed study quality using Newcastle-Ottawa Quality Assessment Scale for cohort studies  
47  
48 (NOS). The NOS is based on selection (4 items), comparability (1 item) and outcome (3 items),  
49  
50 and provides a “star scoring system,” which translates into good, fair, or low quality (12).  
51  
52  
53  
54  
55  
56  
57  
58  
59  
60

1  
2  
3 Quality assessment was performed by two independent reviewers (KT, WSC) and discrepancies  
4  
5 were resolved by discussion.  
6  
7  
8  
9

### 10 ***Statistical Analysis***

11  
12 For each study, we calculated the mean difference and corresponding 95% confidence  
13  
14 intervals (CI) for home and office BP measurements during the third trimester. Meta-  
15  
16 analysis was performed using a random-effects model that include between-study  
17  
18 heterogeneity. Chi squared tests for heterogeneity was used to assess between-study  
19  
20 heterogeneity. Observed heterogeneity was assessed by  $I^2$ , with less than 25% denoting  
21  
22 low heterogeneity. We applied Harbord Egger small study effects analysis to assess for  
23  
24 publication bias. We conducted a sensitivity analysis, where we included studies that  
25  
26 used a validated HBP monitors in the pooled analysis. Analyses were performed using  
27  
28 Review Manager (RevMan, Computer program, Version 5.3. Copenhagen: The Nordic  
29  
30 Cochrane Centre, The Cochrane Collaboration, 2014). All  $P$  values are 2-tailed.  
31  
32  
33  
34  
35  
36  
37  
38  
39

### 40 **Results:**

41  
42 Our search strategy yielded 983 unique citations, of which 47 were eligible for full text review.  
43  
44 Of these 47, we excluded 30 articles: 11 did not include HBP measurements, 10 did not use  
45  
46 HBPM as their intervention, 6 did not compare HBP with OBP, 2 were not performed in the  
47  
48 setting of interest, and 1 did not include pregnant women. Seventeen articles from our search  
49  
50 were included in our systematic review (Figure 1). Three of the studies involved the same cohort  
51  
52 of patients, Babies and their Parents' Longitudinal Observation in Suzuki Memorial Hospital on  
53  
54  
55  
56  
57  
58  
59  
60

1  
2  
3 Intrauterine Period (BOSHI) study, and data specific for the clinical outcomes was extracted  
4 from all studies, avoiding duplication (13-15). Therefore, 15 studies were used in the final  
5 analysis, with a total number of 1689 pregnant participants. Using NOS quality assessment, most  
6 studies were judged to be fair (16-24) and good quality (13-15, 25, 26), while 3 studies were  
7 deemed poor quality (27-29) and high risk of bias.  
8  
9  
10  
11  
12  
13  
14  
15  
16

### 17 ***Study Characteristics***

18  
19 Studies were published from 1987 to 2019, and all recruited patients from antenatal maternity  
20 clinics. The studies included pregnant patients who were normotensive (N=8), had chronic  
21 hypertension (N=2), hypertensive disorders of pregnancy (N=5), high risk of preeclampsia (N=1)  
22 and isolated office hypertension (N=2). Study characteristics are summarized in Table 1.  
23  
24  
25  
26  
27  
28  
29  
30

### 31 ***Patient education and monitoring***

32  
33 Fourteen out of the 15 studies provided either verbal or written instructions to participants on  
34 how to monitor HBP. Three studies used telemonitoring (21, 27, 29) or medical apps (25) to  
35 transmit HBP measurements to clinicians. Four studies provided patient instructions on when to  
36 seek medical advice for their hypertension (19, 22, 23, 25). These triggering BP values were  
37 variable:  $\geq 140/90$  mm Hg with proteinuria or  $\geq 160/100$  mm Hg without proteinuria (19); SBP  
38  $\geq 155$  mm Hg or DBP  $\geq 100$  mm Hg (25); and  $\geq 140/90$  mm Hg or  $\leq 100/60$  mm Hg (23). Tucker  
39 et al implemented a colour coded pamphlet with detailed instructions and follow up (22).  
40  
41  
42  
43  
44  
45  
46  
47  
48  
49  
50

### 51 ***Device selection and validation***



1  
2  
3 Six out of 15 (40.0%) studies used a validated HBP monitor approved for pregnancy (Microlife  
4 Watch BP, Microlife 3A Plus, Omron HEM705CP) (19, 22-26), with Microlife Watch BP  
5  
6 (26.7%) being the most common.  
7  
8  
9  
10

### 11 ***Frequency and timing of HBPM***

12  
13  
14 Frequency and timing of BP measurements varied among studies. Overall, HBP was measured  
15 between 1 to 6 times per day and 1 to 7 times per week. Measuring BP twice in the morning and  
16 evening for 1 week was the most common method described (26.7%). The total number of  
17 measurements recorded per week ranged from 3 to 36. Only one study discarded the first day's  
18 readings prior to averaging the results (23).  
19  
20  
21  
22  
23  
24  
25  
26  
27

### 28 ***Diagnostic Thresholds for HBP Measurements***

29  
30 Five studies calculated the diagnostic thresholds for HBP by applying the HBP data a relative  
31 metric derived from the OBP data of that sample (16, 17, 20, 21, 26). Depending on the method  
32 used, the identified HBP diagnostic threshold for the third trimester was 138/88 mm Hg (2 SD  
33 cut-off) (16), 143/92 mm Hg (90<sup>th</sup> percentile cut-off) (17), 121/80 mm Hg (2 SD cut-off) (20),  
34  
35 118/76 mm Hg (95<sup>th</sup> percentile cut-off) (20), 136/89 mm Hg (regression line from standardized  
36 major axis methods cut-off) (21), and 123/78 (2 SD cut-off) (26). Proposed diagnostic thresholds  
37 for HBPM varied by patient population, methodology, and trimester (Table 2). HBP thresholds  
38 were lower in the first and second trimester compared with the third trimester. Furthermore, in  
39 studies that enrolled subjects without HDP (20, 26), HBP thresholds were lower than studies who  
40 enrolled women with chronic hypertension or HDP (16, 17, 21).  
41  
42  
43  
44  
45  
46  
47  
48  
49  
50  
51  
52  
53  
54  
55  
56  
57  
58  
59  
60

### ***Comparison between HBP and OBP Measurements***

Aggregate data meta-analysis of 11 studies (N=1290 pregnant women) for BP differences between home and office during the third trimester was performed (Figure 2). HBP was noted to be significantly lower than OBP for SBP and DBP by 4.53 (95% CI 2.64-6.41) mm Hg and 3.01 (95% CI 1.42-4.60) mm Hg, respectively. Sensitivity analysis showed similar results for SBP and DBP when comparing studies (N=4) when validated HBP monitors for pregnancy were used (Figure 3). The mean difference between home and office BP using validated HBP monitors for SBP and DBP was 4.89 (95% CI 0.95-8.83) mm Hg and 4.56 (95% CI 1.06-8.06) mm Hg, respectively. Significant heterogeneity was observed in the meta-analysis with  $I^2$  ranging from 83 to 93%. Furthermore, asymmetry was noted in the Harbord Egger small study effects funnel plots, hence suggesting publication bias.

### ***Relationship of HBP measurements to outcomes***

No differences in maternal or fetal outcomes were reported between HBPM and usual care in maternity day unit, however, this study was not powered to detect these differences (25). HBPM was associated with reduction in hypertension related visits (6.5 visits vs. 8 visits,  $p=0.003$ ) (25). Post intervention surveys among pregnant women, illustrated that HBPM was easy to use (29, 30). HBPM changed management plans for 10% of patients in one study, but almost 50% of patients did not follow instructions properly (19).

### ***Compliance in performing HBP measurements***

Compliance to HBPM was reported in 3 studies (15, 19, 23). Iwama *et al* noted that only 9.4% of participants measured their BP daily (15). In contrast, Chung *et al* observed that 81% of

1  
2  
3 participants measured their BP daily for 1 week. (19). Similarly, Lan *et al* noted that 92% of all  
4  
5 patients had greater than 12 home readings over 3 days (23).  
6  
7  
8  
9

## 10 **Discussion**

11  
12 Despite increased adoption of HBPM in the management of pregnant women with hypertension,  
13  
14 deriving an evidence-based approach from the current literature is difficult. Most studies were  
15  
16 not performed using validated devices for pregnancy. Nearly all HBP devices interpret an  
17  
18 oscillometric signal, which may be altered in pregnancy because of changes in vascular  
19  
20 compliance, intravascular volume, and vascular wall edema. This can reduce the oscillometric  
21  
22 signal and underestimate BP (27, 28). Use of non-validated BP devices can under-diagnoses and  
23  
24 under-treat of HDP by 48% and 80%, respectively (31). Furthermore, in a real-world setting, few  
25  
26 pregnant patients use a validated HBP monitor, and even fewer use a validated HBP monitor  
27  
28 specific for pregnancy (32). This may stem from few validated HBP monitors for pregnancy  
29  
30 exist (33), limited availability, costs, and lack of knowledge of clinicians on brands of validated  
31  
32 HBP monitors for pregnancy.  
33  
34  
35  
36  
37  
38  
39

40 Second, the methodology used to determine HBP varied amongst studies. Between 3-36 HBP  
41  
42 readings per week were used to calculate average HBP, and no studies derived prognostic or  
43  
44 outcome algorithms based on these readings. Similarly in non-pregnant population, compliance  
45  
46 with HBPM was noted to worsen when patients are asked to monitor for a longer time period  
47  
48 with greater frequency (34). Even when clear instructions were provided to patients, instructions  
49  
50 were only followed correctly half the time (20). In order to have accurate HBP measurements,  
51  
52 patient education is vital. From the non-pregnant population, a minimum of 12 BP readings is  
53  
54  
55  
56  
57  
58  
59  
60

1  
2  
3 needed for HBPM to be valid (6), and more recently 3 days of BP readings appeared sufficient to  
4 prognostic HBP readings (35). A pragmatic HBP monitoring schedule is necessary to balance  
5 valid HBP readings with patient compliance.  
6  
7  
8  
9

10  
11  
12 From our systematic review, we observed that the proposed diagnostic thresholds for  
13 hypertension in the third trimester of pregnancy varied substantially across studies, ranging from  
14 SBP 118 to 143 mm Hg and DBP 76 to 92 mm Hg (18, 24-26). This is because of patient  
15 heterogeneity and methods used to derive thresholds (18, 24-26). Instead of deriving diagnostic  
16 thresholds using relative metrics from OBP data, it would be preferable to collect high-quality  
17 prognostic data to determine HBP thresholds at which the risk of clinically important  
18 complications begin to rise.  
19  
20  
21  
22  
23  
24  
25  
26  
27  
28  
29

30  
31 An individual patient data meta-analysis by Tucker et al (36) on home and clinic BP  
32 measurements in pregnant women similarly highlighted these limitations. Our meta-analysis  
33 differs from Tucker et al as they reported no differences between home and clinic BP  
34 measurements (mean differences SBP and DBP of 1.5-2.2 mm Hg and 0.7-1.5 mm Hg,  
35 respectively) (36). Significant heterogeneity in the data ( $I^2 > 80\%$ ) was noted, which suggests  
36 significant variability in study design, population, and methodology of HBP measurements. Use  
37 of aggregate data versus individual patient data meta-analysis, inclusion of the BOSHI study  
38 (N=530 pregnant women), and publication bias may account for the differences in our results.  
39  
40 Given the large heterogeneity of these two meta-analysis secondary to variability in study design,  
41 patient selection and HBP devices used warrants further forethought before clinical  
42 implementation that home and clinic BP are equivalent.  
43  
44  
45  
46  
47  
48  
49  
50  
51  
52  
53  
54  
55  
56  
57  
58  
59  
60

1  
2  
3  
4  
5 Kalafat et al noted in their systematic review and meta-analysis that antenatal use of HBPM  
6 reduced risk of induction of labour (OR: 0.55, 95% CI: 0.36-0.88), prenatal hospital admissions  
7 (OR 0.31, 95% CI: 0.19-0.49), and diagnosis of preeclampsia (OR:0.50, 95% CI: 0.31-0.81), and  
8 number of antenatal visits (standard mean difference -0.49, 95% CI: -0.82 to -0.16). However,  
9  
10 significant clinical heterogeneity, low quality of evidence, and small sample size, are significant  
11  
12 limitations to this study (37).  
13  
14  
15  
16  
17  
18  
19  
20

21 The strengths of our systematic review were adopting rigorous criteria to assess how HBP was  
22 used in pregnant patients (6), which allowed us to systematically review the process of how HBP  
23 was being prescribed in pregnancy. Limitations include lack of randomized controlled trials and  
24 outcome data for HBPM in pregnancy. Publication bias and small study size may influence the  
25 effect size of the differences between HBP and OBP measurements. At least one-third of  
26 the patients were from the BOSHI study and therefore, it may skew the data towards  
27 their study results. Furthermore, amongst the studies assessed, the rigor of how HBPM  
28 was conducted was low, especially in terms of using validated home BP devices,  
29 inadequate patient education, and lack of standardized HBPM schedule. Poor data  
30 quality can influence the interpretation of this meta-analysis. Therefore, future studies  
31 with strong emphasis on the rigorous use of HBPM in pregnancy are needed.  
32  
33  
34  
35  
36  
37  
38  
39  
40  
41  
42  
43  
44  
45  
46  
47  
48  
49  
50

51  
52 Nevertheless, HBPM is an important tool when managing women with HDP. HBPM is vital in  
53 detecting rapid and acute BP changes especially when pre-eclampsia develops. Qualitative  
54  
55  
56  
57  
58  
59  
60

1  
2  
3 analysis from these studies also showed that patients described clinical benefit with HBPM with  
4 decreased need for antenatal visits (22), timely adjustments of anti-hypertensive medications  
5 (21), and ease of use (17).  
6  
7  
8  
9

10  
11  
12 HBPM has potential to revolutionize care of pregnant women with hypertension. However,  
13 based on current studies, the implementation of HBPM is uncertain. Future studies evaluating  
14 HBP monitors for HDP, should use validated devices, collect reference data in health pregnant  
15 samples, use guideline concordant HBPM schedules, define diagnostic and treatment thresholds  
16 based on HBP measurements, and collect outcome data.  
17  
18  
19  
20  
21  
22  
23  
24  
25

### 26 **Conclusions:**

27  
28 Although HBPM is increasingly used in pregnancy, current studies do not provide adequate  
29 guidance with respect to the use of HBPM in pregnant patients. Future studies are needed and  
30 these should focus on defining diagnostic and treatment thresholds for HBP and clarifying the  
31 relationship between HBPM and clinically important outcomes.  
32  
33  
34  
35  
36  
37  
38  
39  
40  
41  
42  
43  
44  
45  
46  
47  
48  
49  
50  
51  
52  
53  
54  
55  
56  
57  
58  
59  
60

## References:

1. Nerenberg KA, Zarnke KB, Leung AA, Dasgupta K, Butalia S, McBrien K, et al. Hypertension Canada's 2018 Guidelines for Diagnosis, Risk Assessment, Prevention, and Treatment of Hypertension in Adults and Children. *Can J Cardiol*. 2018;34(5):506-25.
2. Imai Y, Kario K, Shimada K, Kawano Y, Hasebe N, Matsuura H, et al. The Japanese Society of Hypertension Guidelines for Self-monitoring of Blood Pressure at Home (Second Edition). *Hypertens Res*. 2012;35(8):777-95.
3. Krause T, Lovibond K, Caulfield M, McCormack T, Williams B, Guideline Development G. Management of hypertension: summary of NICE guidance. *BMJ*. 2011;343:d4891.
4. Williams B, Mancia G, Spiering W, Agabiti Rosei E, Azizi M, Burnier M, et al. 2018 ESC/ESH Guidelines for the management of arterial hypertension: The Task Force for the management of arterial hypertension of the European Society of Cardiology and the European Society of Hypertension: The Task Force for the management of arterial hypertension of the European Society of Cardiology and the European Society of Hypertension. *J Hypertens*. 2018;36(10):1953-2041.
5. Whelton PK, Carey RM, Aronow WS, Casey DE, Jr., Collins KJ, Dennison Himmelfarb C, et al. 2017 ACC/AHA/AAPA/ABC/ACPM/AGS/APhA/ASH/ASPC/NMA/PCNA Guideline for the Prevention, Detection, Evaluation, and Management of High Blood Pressure in Adults: A Report of the American College of Cardiology/American Heart Association Task Force on Clinical Practice Guidelines. *Circulation*. 2018;138(17):e484-e594.
6. Parati G, Stergiou GS, Asmar R, Bilo G, de Leeuw P, Imai Y, et al. European Society of Hypertension guidelines for blood pressure monitoring at home: a summary report of the Second International Consensus Conference on Home Blood Pressure Monitoring. *J Hypertens*. 2008;26(8):1505-26.
7. Duley L. The global impact of pre-eclampsia and eclampsia. *Semin Perinatol*. 2009;33(3):130-7.
8. Magee LA, von Dadelszen P, Chan S, Gafni A, Gruslin A, Helewa M, et al. Women's views of their experiences in the CHIPS (Control of Hypertension in Pregnancy Study) Pilot Trial. *Hypertens Pregnancy*. 2007;26(4):371-87.
9. Dehaeck U, Thurston J, Gibson P, Stephanson K, Ross S. Blood Pressure Measurement for Hypertension in Pregnancy. *Journal of Obstetrics and Gynaecology Canada*. 2010;32(4):328-34.
10. Tran K, Potts J, Robertson J, Ly K, Dayan N, Khan N, et al. Out-of-office blood pressure measurement for the diagnosis of hypertension in pregnancy: Survey of Canadian Obstetric Medicine and Maternal Fetal Medicine specialists. *Obstetric Medicine*. 0(0):1753495X18819338.
11. Magee LA, Pels A, Helewa M, Rey E, von Dadelszen P, Canadian Hypertensive Disorders of Pregnancy Working G. Diagnosis, evaluation, and management of the hypertensive disorders of pregnancy. *Pregnancy Hypertens*. 2014;4(2):105-45.
12. Wells GA SB, O'Connell D, Peterson J, Welch V, Losos M, et al. The Newcastle-Ottawa Scale (NOS) for assessing the quality if nonrandomized studies in meta-analyses. [Available from: [http://www.ohri.ca/programs/clinical\\_epidemiology/oxford.htm](http://www.ohri.ca/programs/clinical_epidemiology/oxford.htm). .
13. Ishikuro M, Obara T, Metoki H, Ohkubo T, Yamamoto M, Akutsu K, et al. Blood pressure measured in the clinic and at home during pregnancy among nulliparous and multiparous women: the BOSHI study. *Am J Hypertens*. 2013;26(1):141-8.



14. Ishikuro M, Obara T, Metoki H, Ohkubo T, Kikuya M, Yaegashi N, et al. Differences between clinic and home blood pressure measurements during pregnancy. *J Hypertens*. 2015;33(7):1492-3.
15. Iwama N, Metoki H, Ohkubo T, Ishikuro M, Obara T, Kikuya M, et al. Maternal clinic and home blood pressure measurements during pregnancy and infant birth weight: the BOSHI study. *Hypertens Res*. 2016;39(3):151-7.
16. Lo C, Taylor RS, Gamble G, McCowan L, North RA. Use of automated home blood pressure monitoring in pregnancy: is it safe? *Am J Obstet Gynecol*. 2002;187(5):1321-8.
17. Rey E, Pilon F, Boudreault J. Home blood pressure levels in pregnant women with chronic hypertension. *Hypertens Pregnancy*. 2007;26(4):403-14.
18. Rey E, Morin F, Boudreault J, Pilon F, Vincent D, Ouellet D. Blood pressure assessments in different subtypes of hypertensive pregnant women: office versus home patient- or nurse-measured blood pressure. *Hypertens Pregnancy*. 2009;28(2):168-77.
19. Chung Y, de Greeff A, Shennan A. Validation and compliance of a home monitoring device in pregnancy: microlife WatchBP home. *Hypertens Pregnancy*. 2009;28(3):348-59.
20. Denolle T. [Home blood pressure measurement and pregnancy]. *Presse Med*. 2014;43(7-8):827-30.
21. Mikami Y, Takai Y, Era S, Ono Y, Saitoh M, Baba K, et al. Provisional criteria for the diagnosis of hypertension in pregnancy using home blood pressure measurements. *Hypertens Res*. 2017;40(7):679-84.
22. Tucker KL, Taylor KS, Crawford C, Hodgkinson JA, Bankhead C, Carver T, et al. Blood pressure self-monitoring in pregnancy: examining feasibility in a prospective cohort study. *BMC Pregnancy Childbirth*. 2017;17(1):442.
23. Lan PG, Hyett J, Gillin AG. Home blood pressure measurement in women with pregnancy-related hypertensive disorders. *Pregnancy Hypertens*. 2017;10:213-9.
24. Kalafat E, Mir I, Perry H, Thilaganathan B, Khalil A. Is Home Blood Pressure Monitoring in Hypertensive Disorders of Pregnancy Consistent with Clinic Recordings? *Ultrasound Obstet Gynecol*. 2018.
25. Perry H, Sheehan E, Thilaganathan B, Khalil A. Home blood-pressure monitoring in a hypertensive pregnant population. *Ultrasound Obstet Gynecol*. 2018;51(4):524-30.
26. Vestgaard M, Carstens Soholm J, Kjaerhus Norgaard S, Asbjornsdottir B, Ringholm L, Damm P, et al. Home blood pressure in pregnancy-the upper reference limit. *Blood Press Monit*. 2019;24(4):191-8.
27. Dalton KJ, Manning K, Robarts PJ, Dripps JH, Currie JR. Computerized home telemetry of maternal blood pressure in hypertensive pregnancy. *Int J Biomed Comput*. 1987;21(3-4):175-87.
28. Mooney P, Jaspar A, Cartwright W, Swindells HE, Dalton KJ. No difference between home and clinic blood pressure measurements in pregnancy: a computerized telemetric study. *J Perinat Med*. 1991;19(1-2):133-9.
29. Naef RW, 3rd, Perry KG, Jr., Magann EF, McLaughlin BN, Chauhan SP, Morrison JC. Home blood pressure monitoring for pregnant patients with hypertension. *J Perinatol*. 1998;18(3):226-9.
30. Hinton L, Tucker KL, Greenfield SM, Hodgkinson JA, Mackillop L, McCourt C, et al. Blood pressure self-monitoring in pregnancy (BuMP) feasibility study; a qualitative analysis of women's experiences of self-monitoring. *BMC Pregnancy Childbirth*. 2017;17(1):427.



- 1  
2  
3 31. Nzelu D, Yeung F, Couderq D, Shennan A, Kametas NA. An inaccurate automated  
4 device negatively impacts the diagnosis and treatment of gestational hypertension. *Pregnancy*  
5 *Hypertens.* 2017;10:28-33.  
6  
7 32. Tremonti C, Beddoe J, Brown MA. Reliability of home blood pressure monitoring  
8 devices in pregnancy. *Pregnancy Hypertens.* 2017;8:9-14.  
9  
10 33. Bello NA, Woolley JJ, Cleary KL, Falzon L, Alpert BS, Oparil S, et al. Accuracy of  
11 Blood Pressure Measurement Devices in Pregnancy: A Systematic Review of Validation Studies.  
12 *Hypertension.* 2018;71(2):326-35.  
13  
14 34. Celler B, Argha A, Varnfield M, Jayasena R. Patient Adherence to Scheduled Vital Sign  
15 Measurements During Home Telemonitoring: Analysis of the Intervention Arm in a Before and  
16 After Trial. *JMIR Med Inform.* 2018;6(2):e15.  
17  
18 35. Hodgkinson JA, Stevens R, Grant S, Mant J, Bray EP, Hobbs FDR, et al. Schedules for  
19 Self-monitoring Blood Pressure: A Systematic Review. *Am J Hypertens.* 2019;32(4):350-64.  
20  
21 36. Tucker KL, Bankhead C, Hodgkinson J, Roberts N, Stevens R, Heneghan C, et al. How  
22 Do Home and Clinic Blood Pressure Readings Compare in Pregnancy? *Hypertension.*  
23 2018;72(3):686-94.  
24  
25 37. Kalafat E, Benlioglu C, Thilaganathan B, Khalil A. Home blood pressure monitoring in  
26 the antenatal and postpartum period: A systematic review meta-analysis. *Pregnancy Hypertens.*  
27 2020;19:44-51.  
28  
29  
30  
31  
32  
33  
34  
35  
36  
37  
38  
39  
40  
41  
42  
43  
44  
45  
46  
47  
48  
49  
50  
51  
52  
53  
54  
55  
56  
57  
58  
59  
60

1  
2  
3  
4  
5  
6  
7  
8  
9  
10  
11  
12  
13  
14  
15  
16  
17  
18  
19  
20  
21  
22  
23  
24  
25  
26  
27  
28  
29  
30  
31  
32  
33  
34  
35  
36  
37  
38  
39  
40  
41  
42  
43  
44  
45  
46  
47

**Table 1: Summary of home blood pressure monitoring studies in pregnancy**

| Author                   | Year       | Country        | Setting             | Population           | Sample size | Mean age (years)                 | Baseline mean Office BP (mm Hg)               | Brand of HBPM               | Validated for use in pregnancy | Number of BP measurements per week |
|--------------------------|------------|----------------|---------------------|----------------------|-------------|----------------------------------|-----------------------------------------------|-----------------------------|--------------------------------|------------------------------------|
| Dalton (27)              | 1987       | United Kingdom | Antenatal Clinic    | HDP                  | 10          | 28-39                            | 136±17/<br>83±8                               | Dinamap 1846                | No                             | 4-28                               |
| Mooney (28)              | 1991       | United Kingdom | Antenatal Clinic    | 1-2 high BP readings | 35          | NA                               | 139±13/<br>74 ±10                             | Dinamap 1846P               | No                             | 10                                 |
| Naef (29)                | 1998       | USA            | Antenatal Clinic    | HTN                  | 7           | NA                               | 102±10 (MAP)                                  | Vasoplex                    | No                             | 4-28                               |
| Lo (16)                  | 2002       | New Zealand    | Antenatal Clinic    | Normal               | 101         | NA                               | 107±8/<br>66±7                                | Omron HEM 705CP             | Yes                            | 4 (one day only)                   |
| Rey (17)                 | 2007       | Canada         | Antenatal Clinic    | Normal, HTN          | 123         | Normal 31.4<br>HTN 32.7          | 127±3/<br>80±2                                | Aneroid                     | No                             | 3-7                                |
| Rey (18)                 | 2009       | Canada         | Antenatal Clinic    | HTN, IOH, PET        | 159         | HTN 32.5<br>IOH 29.6<br>PET 32.2 | NA                                            | Aneroid                     | No                             | 6-14                               |
| Chung (19)               | 2009       | United Kingdom | Antenatal Clinic    | HDP                  | 21          | NA                               | NA                                            | Microlife Watch BP          | Yes                            | 24                                 |
| BOSHI Study (13, 14, 22) | 2012, 2015 | Japan          | University Hospital | Normal               | 530         | 31.2                             | Normal 108±11/<br>66±9<br>HTN 119±13/<br>74±9 | Omron HEM747IC<br>HEM7080IC | No                             | 7                                  |

|                |      |                |                  |                            |     |      |                 |                   |     |      |
|----------------|------|----------------|------------------|----------------------------|-----|------|-----------------|-------------------|-----|------|
| Denolle (20)   | 2014 | France         | Antenatal Clinic | Normal                     | 45  | 30   | 115±11/<br>65±7 | Hestia Pharma D2  | No  | 36   |
| Tucker (22)    | 2017 | United Kingdom | Antenatal Clinic | High risk for Preeclampsia | 161 | 31.0 | 117±10/<br>71±9 | Microlife WatchBP | Yes | 12   |
| Mikami (21)    | 2017 | Japan          | Antenatal Clinic | Normal                     | 100 | 35.8 | 114±10/<br>68±6 | Omron 7251G       | No  | 14   |
| Perry (25)     | 2017 | United Kingdom | Antenatal Clinic | HTN                        | 166 | 32.5 | NA              | Microlife WatchBP | Yes | 4-14 |
| Lan (23)       | 2017 | Australia      | Antenatal Clinic | HTN                        | 37  | 33.4 | NA              | Omron HEM-7200    | No  | 14   |
| Kalafat (24)   | 2018 | United Kingdom | Antenatal Clinic | HTN                        | 147 | 34   | 134±3/<br>88±3  | Microlife WatchBP | Yes | NA   |
| Vestgaard (26) | 2019 | Denmark        | Antenatal Clinic | Normal                     | 103 | 32   | 115±11/72<br>±7 | Microlife 3A Plus | Yes | 18   |

HBPM, home blood pressure monitor; HDP, hypertensive disorders of pregnancy; BP, blood pressure; HTN, hypertension; IOH, isolated office hypertension; PET, preeclampsia; NA, not available; BOSHI, Babies and their Parents' Longitudinal Observation in Suzuki Memorial Hospital on Intrauterine Period.

1  
2  
3  
4  
5  
6  
7  
8  
9  
10  
11  
12  
13  
14  
15  
16  
17  
18  
19  
20  
21  
22  
23  
24  
25  
26  
27  
28  
29  
30  
31  
32  
33  
34  
35  
36  
37  
38  
39  
40  
41  
42  
43  
44  
45  
46  
47

**Table 2: Summary of proposed definitions for trimester-specific upper limit of normal home blood pressure**

| Author         | Population              | Method                                               | T1 SBP (mmHg)    | T1 DBP (mmHg)   | T2 SBP (mmHg)        | T2 DBP (mmHg)      | T3 SBP (mmHg)             | T3 DBP (mmHg)          |
|----------------|-------------------------|------------------------------------------------------|------------------|-----------------|----------------------|--------------------|---------------------------|------------------------|
| Lo (16)        | Normal                  | Mean ± 2SD                                           | 132              | 82              | 130                  | 79                 | 133/138*                  | 81/88*                 |
| Rey (17)       | Normal and Hypertensive | 90 <sup>th</sup> percentile                          | 139 <sup>^</sup> | 89 <sup>^</sup> | 137                  | 87                 | 138/140/143 <sup>\$</sup> | 89/90/92 <sup>\$</sup> |
| Denolle (20)   | Normal                  | Mean ± 2SD                                           | 118              | 73              | 117                  | 73                 | 121                       | 80                     |
| Denolle (20)   | Normal                  | 95 <sup>th</sup> Percentile                          | 116              | 70              | 113                  | 70                 | 118                       | 76                     |
| Mikami (21)    | Normal                  | Regression line from standardized major axis methods | 120.8            | 83.5            | 124/127 <sup>#</sup> | 84/86 <sup>#</sup> | 136                       | 89                     |
| Vestgaard (26) | Normal                  | Mean ± 2SD                                           | 117              | 74              | 116                  | 73                 | 123                       | 78                     |

T1, first trimester; SBP, systolic blood pressure; DBP, diastolic blood pressure; T2, second trimester; T3, third trimester; SD, standard deviation; \* blood pressure measured at 27-30 weeks and 35-37 weeks gestation; ^ blood pressure measured at less than 20 weeks gestation; \$ blood pressure measured at 28-32 weeks, 33-36 weeks, and greater than 36 weeks gestation; # blood pressure measured at 12-20 weeks and 20-24 weeks gestation

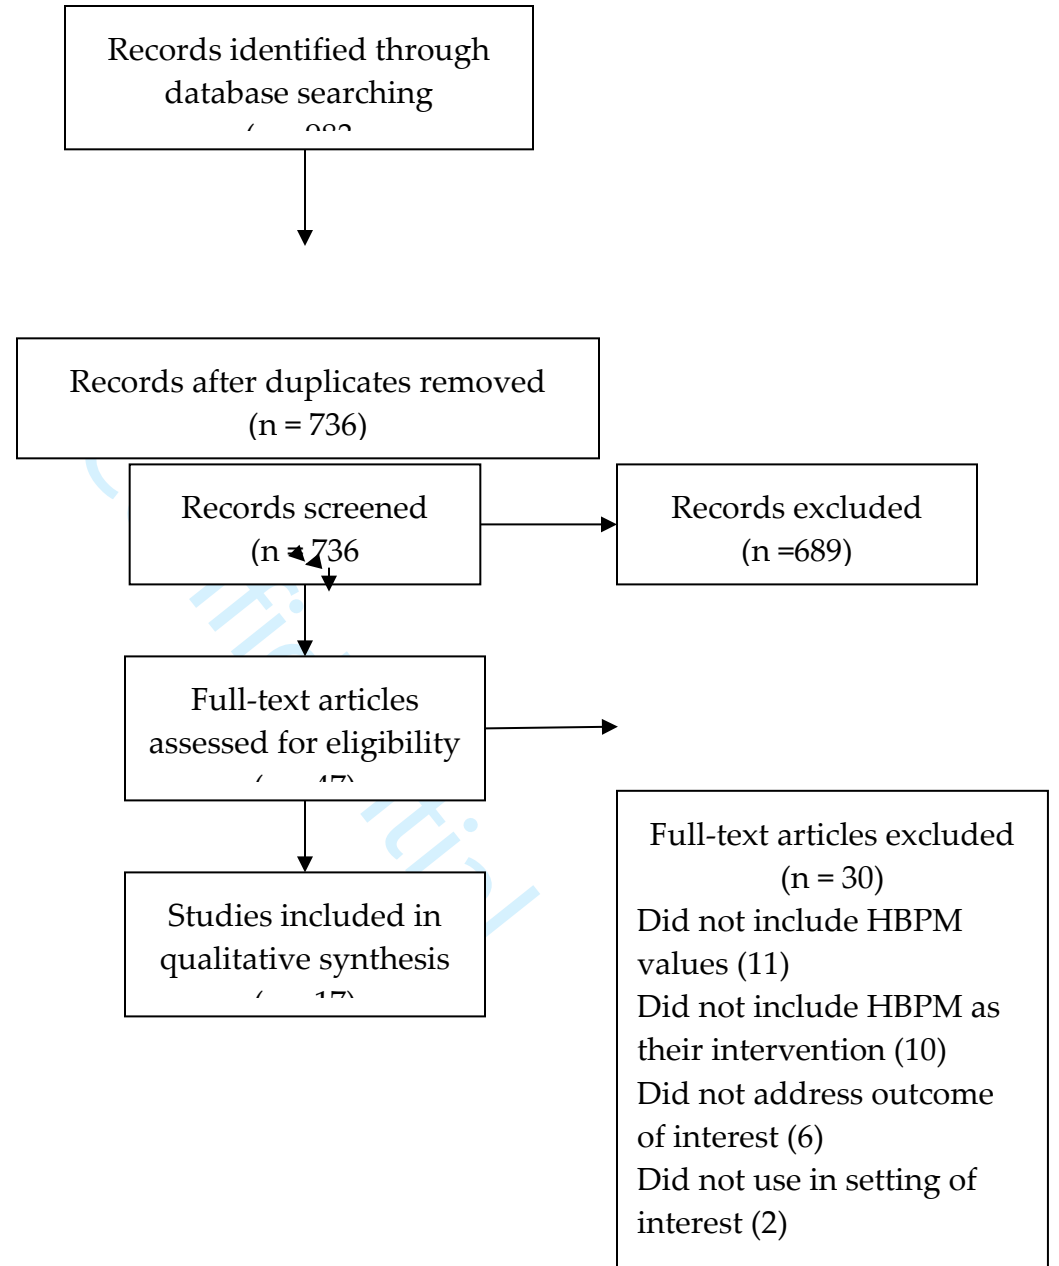

**Figure 1: PRISMA flow diagram**

A.

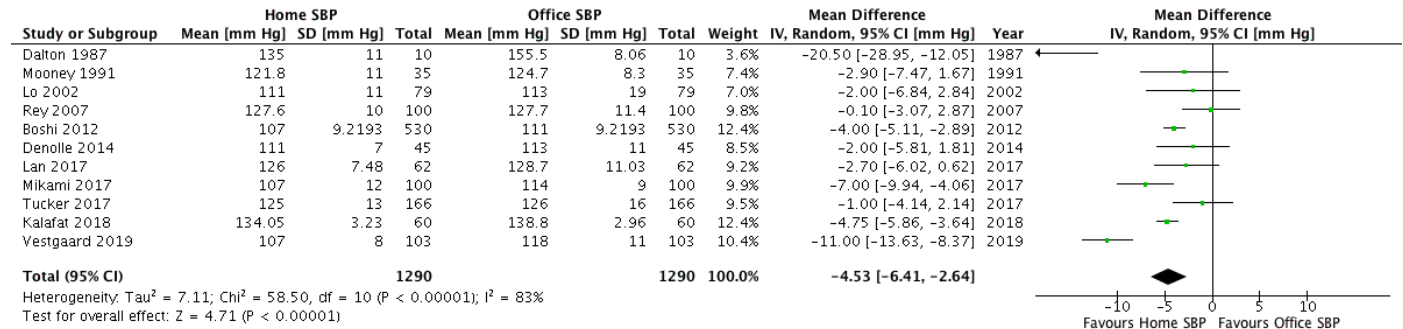

B.

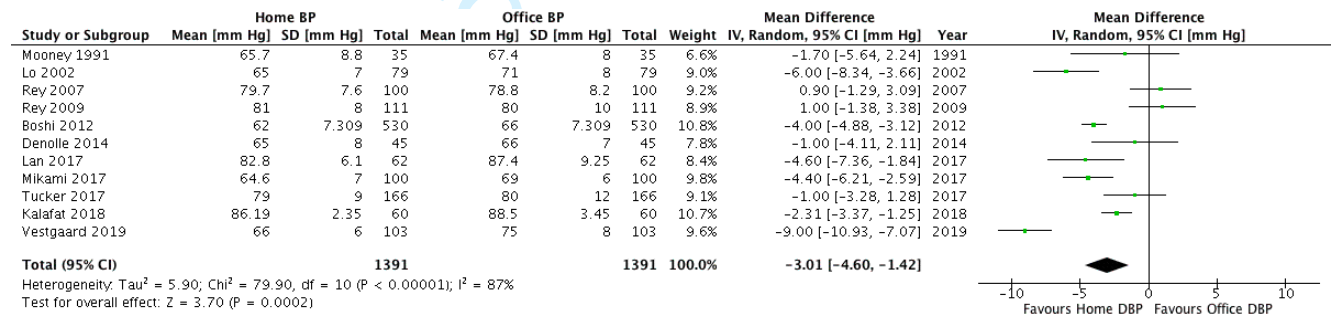

**Figure 2:** Forest plot of comparison: Differences in mean (A) systolic blood pressure (SBP) and (B) diastolic blood pressure (DBP) in the third trimester between home and office blood pressure measurements in pregnancy.

## A.

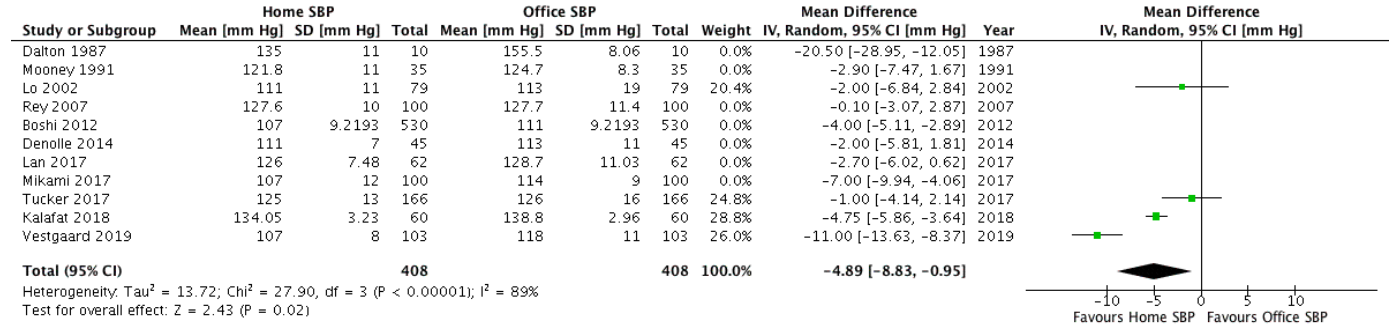

## B.

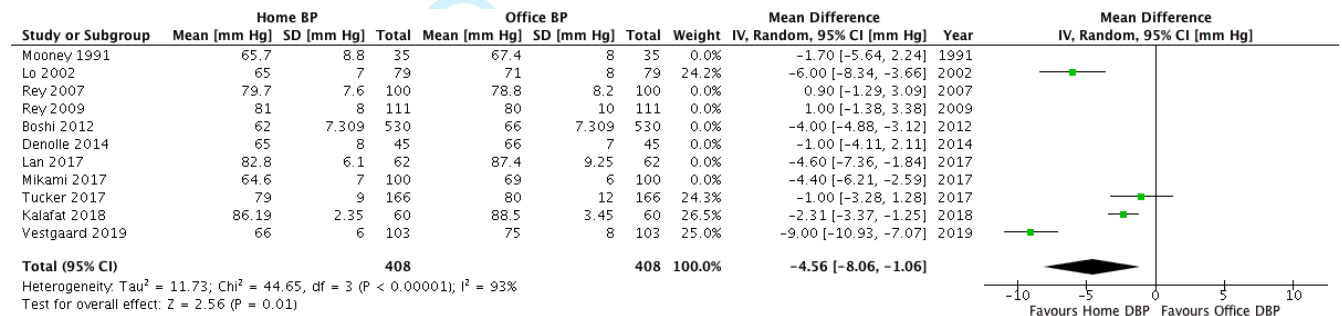

**Figure 3:** Forest plot of comparison: Differences in mean (A) systolic blood pressure (SBP) and (B) diastolic blood pressure (DBP) in the third trimester between home and office blood pressure measurements in pregnancy in studies using validated home blood pressure monitors.

**Supplementary****EMBASE (Ovid) Search**

Performed on March 10, 2020

Database: Embase <1974 to 2020 March 10>

Search Strategy:

- 
- 1 exp pregnancy/ (652065)
  - 2 blood pressure/ or blood pressure cuff/ (589054)
  - 3 (self\* or home\*).mp. [mp=title, abstract, heading word, drug trade name, original title, device manufacturer, drug manufacturer, device trade name, keyword, floating subheading word] (1334076)
  - 4 exp blood pressure measurement/ (96444)
  - 5 2 or 4 (597092)
  - 6 1 and 5 (14680)
  - 7 3 and 6 (632)

EMBASE Search 632 references  
1 duplicated removed

**Medline (Ovid) Search**

Performed on March 31, 2020

Database: Ovid MEDLINE(R) Epub Ahead of Print, In-Process & Other Non-Indexed Citations, Ovid MEDLINE(R) Daily and Ovid MEDLINE(R) <1946 to Present>

Search Strategy:

- 
- 1 exp PREGNANCY/ (884803)
  - 2 exp Blood Pressure/ (287884)
  - 3 Blood Pressure Determination/ (27639)
  - 4 2 or 3 (299700)
  - 5 (self\* or home\*).mp. [mp=title, abstract, original title, name of substance word, subject heading word, keyword heading word, protocol supplementary concept word, rare disease supplementary concept word, unique identifier, synonyms] (1366031)
  - 6 1 and 4 and 5 (387)



\*\*\*\*\*

MEDLINE Search 387

**CENTRAL Search**

Performed on March 31, 2020

Database: EBM Reviews - Cochrane Central Register of Controlled Trials <January 2018>

Search Strategy:

- 
- 1 exp PREGNANCY/ (20603)
  - 2 exp Blood Pressure/ (27108)
  - 3 Blood Pressure Determination/ (1057)
  - 4 2 or 3 (27615)
  - 5 (self\* or home\*).mp. [mp=title, abstract, original title, name of substance word, subject heading word, keyword heading word, protocol supplementary concept word, rare disease supplementary concept word, unique identifier, synonyms] (145155)
  - 6 1 and 4 and 5 (25)

\*\*\*\*\*

Articles found 25
